# Supplementary material for: Genioplasty combined with counterclockwise rotation of the maxillomandibular complex for the treatment of obstructive sleep apnea
Source: Research Square preprint supplement (doi:10.21203/rs.3.rs-7284882/v1), 2025-08-25
Supplement: Supplementary file 1 [file 985fd9386156dc750d632ac8.docx]

Table 1: Respiratory and oximetric data

|  | ***Before*** | ***After*** | ***Before*** | ***After*** |
| --- | --- | --- | --- | --- |
| **Snoring** | **65%** | **0** | **71** | **0** |
| **AHI (Apnea-Hypopnea Index)** | **43** | **3** | **40** | **2** |
| **AI (Apnea Index)** | **26** | **2** | **24** | **3** |
| **HI (Hypopnea Index)** | **18** | **1** | **15** | **0** |
| **Mean Apnea Duration** | **19 sec** | **6 sec** | **13** | **0** |
| **Oxygen Desaturation Index (ODI)** | **43** | **2** | **40** | **1** |
| **Mean SaO₂** | **95 +/- 2** | **99%** | **94 +/-12** | **99%** |
| **Lowest Oxygen Saturation (Nadir SaO2)** | **81%** | **97%** | **83%** | **97%** |
| **Mean Desaturation Events** | **8.2%** | **0** | **7%** | **0** |
| **Percentage of Time with SaO₂ < 90% (SaO2 < 90%)** | **6.7%** | **0** | **6.2%** | **0** |
