# Supplementary material for: Genioplasty combined with counterclockwise rotation of the maxillomandibular complex for the treatment of obstructive sleep apnea
Source: Research Square preprint supplement (doi:10.21203/rs.3.rs-7284882/v1), 2025-08-25
Supplement: Supplementary file 2 [file e1a537a2cbc65877e9c12ab7.docx]

Table 1: Respiratory and oximetric data

|  | Before | After | Before | After |
| --- | --- | --- | --- | --- |
| Snoring | 65% | 0 | 71 | 0 |
| **AHI (Apnea-Hypopnea Index)** | 43 | 3 | 40 | 2 |
| AI (Apnea Index) | 26 | 2 | 24 | 3 |
| HI (Hypopnea Index) | 18 | 1 | 15 | 0 |
| Mean Apnea Duration | 19 sec | 6 sec | 13 | 0 |
| Oxygen Desaturation Index (ODI) | 43 | 2 | 40 | 1 |
| Mean SaO₂ | 95 +/- 2 | 99% | 94 +/-12 | 99% |
| Lowest Oxygen Saturation (Nadir SaO2) | 81% | 97% | 83% | 97% |
| Mean Desaturation Events | 8.2% | 0 | 7% | 0 |
| Percentage of Time with SaO₂ < 90% (SaO2 < 90%) | 6.7% | 0 | 6.2% | 0 |
